# Supplementary material for: The Anti-Pseudomonal Peptide D-BMAP18 Is Active in Cystic Fibrosis Sputum and Displays Anti-Inflammatory In Vitro Activity
Source: MDPI journal article supplement (doi:10.3390/microorganisms8091407), 2020-09-12
Supplement: s1 [file s1]

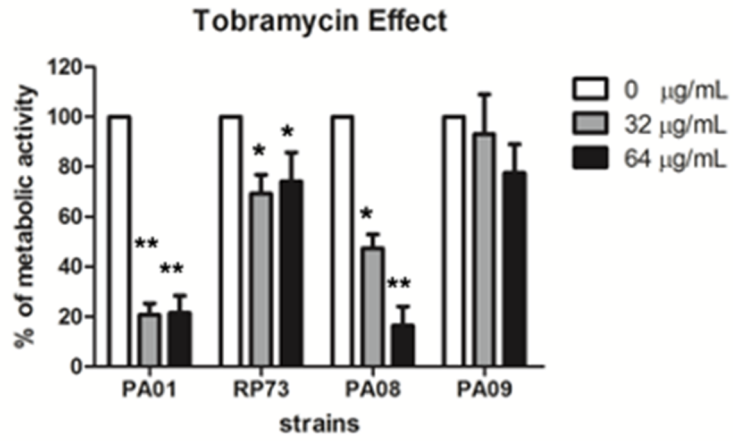

**Figure S1.** Biofilm eradication activity of Tobramycin. MTT viability test on preformed biofilms on PA01, RP73, PA08 and PA09. Percentage of metabolic active biofilm after 24h-treatment in comparison with the untreated control of growth is shown. The results are the average of three independent experiments in internal triplicate ( $n = 9$ ).  $**p < 0.01$ ,  $*p < 0.05$ . Test t-student comparing samples with/without treatment.
